# Supplementary material
Source: ML conference proceedings conference paper supplement (https://openaccess.thecvf.com/content/ICCV2025/html/Galliena_Embodied_Image_Captioning_ICCV_2025_paper.html)
Supplement: Supplementary file 1 [file Galliena_Embodied_Image_Captioning_ICCV_2025_supplemental.pdf]

# Embodied Image Captioning: Self-supervised Learning Agents for Spatially Coherent Image Descriptions Supplementary Material

Tommaso Galliena<sup>1,2</sup>, Tommaso Apicella<sup>1</sup>, Stefano Rosa<sup>1</sup>, Pietro Morerio<sup>1</sup>, Alessio del Bue<sup>1</sup>,  
Lorenzo Natale<sup>1</sup>

<sup>1</sup>Istituto Italiano di Tecnologia, Genoa, Italy

<sup>2</sup>University of Genoa, Genoa, Italy

name.surname@iit.it

## A. Experimental setup

**Datasets.** Gibson reflects the complexity of 572 real-world environments featuring object categories such as tables, sofas, plants, in different settings (rooms and object instances). HM3D comprises 1,000 reconstructed indoor residential and commercial environments having higher quality than Gibson [4].

**Methods under comparison.** We compare three exploration policies: *random goals*, *frontier exploration* and the learned policy (*CLA*). The first two policies use the same path planner that first converts the explored map into a visibility graph (nodes represent feasible goals and edges the straight trajectory without obstacles) via skeletonization, then computes the optimal trajectory between the current position and the goal using graph search, considering nodes in the trajectory as sub-goals. Moreover, we delete repeated samples caused by the agent revisiting certain poses during exploration, to train and test on different images. Training images are augmented with 50% probability using horizontal flip, gaussian noise and affine transformations.

**Captioners fine-tuning setup.** We report the training setup used to fine-tune CoCa [5] and BLIP2 [2] in Table 1. Note that we use LoRA [1] to fine-tune BLIP2 due to the large amount of parameters to reduce instability during the fine-tuning processing and reduce the amount of time needed for the fine-tuning processing.

## B. Ablation studies

**Pseudo-caption ablation.** Results in Tab. 2 show that compared to LLaMa, Mistral achieves -1.85 p.p. in SP and -0.42 p.p. in CI while Qwen achieves -1.41 p.p. in SP and -0.13 p.p. in CI using BLIP2. Also using CoCa, LLaMa outperforms other LLMs. Varying the LLMs, our prompt with caption frequency outperforms ECO and IC3 (Tab.1 main paper).

| Hyperparameter   | CoCa          | BLIP2         |
|------------------|---------------|---------------|
| Learning Rate    | 0.0005        | 0.0001        |
| lr scheduler     | cosine        | -             |
| Batch Size       | 64            | 64            |
| Num Workers      | 4             | 4             |
| Optimizer        | AdamW         | AdamW         |
| Weight Decay     | 0.001         | 0.001         |
| Epochs           | 10            | 10            |
| Patience         | 3             | 3             |
| Rotation         | [-10.0, 10.0] | [-10.0, 10.0] |
| Shear            | [-10.0, 10.0] | [-10.0, 10.0] |
| Gaussian noise   | $0 \pm 0.5$   | $0 \pm 0.5$   |
| Contrastive-loss | 0             | -             |
| LoRA rank        | -             | 8             |
| LoRA alpha       | -             | 16            |
| LoRA dropout     | -             | 0.3           |
| LoRA bias        | -             | None          |

Table 1. Finetuning hyperparameters

| Captioner | LLM        | $B_4$ | $M$   | $R_L$ | $CI$ | $SP$  | $CS$  |
|-----------|------------|-------|-------|-------|------|-------|-------|
| CoCa      | Mistral-7B | 17.21 | 22.07 | 44.70 | 1.13 | 29.29 | 71.63 |
|           | Qwen3-8B   | 19.95 | 23.95 | 49.60 | 1.31 | 33.59 | 73.37 |
| BLIP-2    | Mistral-7B | 16.46 | 24.05 | 48.02 | 1.20 | 33.73 | 72.11 |
|           | Qwen3-8B   | 19.37 | 24.62 | 51.43 | 1.49 | 34.17 | 73.02 |

Table 2. LD-CPS ablation on HM3D with CLA.

**Ablation study on triplet loss.** Table 3 shows the effect of the  $\lambda_{tr}$  coefficient on the captioners fine-tuning. We experiment  $\lambda_{tr} = \{1, 0.5, 0.1\}$ . Results show that a choice of  $\lambda_{tr} = 0.1$  achieves higher performance values compared to standard fine-tuning and other triplet weights. With  $\lambda_{tr} = 1$  the fine-tuned model has worse performance values compared to other triplet loss weights and standard fine-tuned model with all the exploration policies apart from CLA.

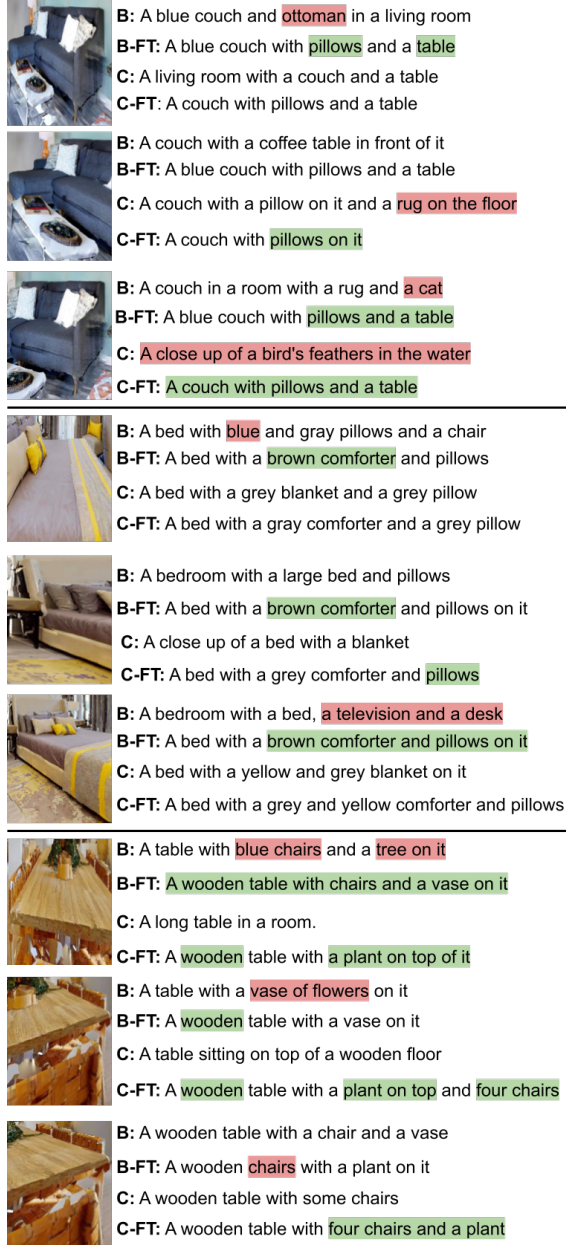

Figure 1. Examples of predicted captions before and after fine-tuning for different object views. We highlight **mistakes** and **correct details** in generated captions. KEYS – C: off-the-shelf CoCa [5], C-FT: fine-tuned (triplet loss) CoCa, B: BLIP2 [2], B-FT: fine-tuned (triplet loss) BLIP2.

### C. Inference time

On an NVIDIA Tesla V100 16GB, the time for an exploration step is 0.266 s for CLA equipped with CoCa, 0.271 s equipped with BLIP2 (averaged over 300 steps); of these timings, the captioning inference time is 6.65 ms for

|        | Captioner | Pseudo-caption | Policy   | Fine-tuning          | $B_4$ | $M$   | $R_L$ | $CI$ | $SP$  | $CS$  |
|--------|-----------|----------------|----------|----------------------|-------|-------|-------|------|-------|-------|
| Gibson | CoCa      | -              | -        | NoFT                 | 12.15 | 21.47 | 42.83 | 0.63 | 28.30 | 63.30 |
|        |           |                |          | Standard             | 19.55 | 23.36 | 51.10 | 1.01 | 33.21 | 70.11 |
|        |           |                |          | $\lambda_{tr} = 1.0$ | 18.94 | 23.73 | 51.95 | 0.97 | 34.11 | 71.18 |
|        |           |                |          | $\lambda_{tr} = 0.5$ | 19.49 | 24.52 | 52.28 | 1.03 | 35.56 | 73.87 |
|        |           |                |          | $\lambda_{tr} = 0.1$ | 19.85 | 24.83 | 53.10 | 1.12 | 35.58 | 73.26 |
|        |           |                |          | Standard             | 17.93 | 24.92 | 51.00 | 1.08 | 35.65 | 73.20 |
|        |           | Ours           | Frontier | $\lambda_{tr} = 1.0$ | 16.53 | 23.58 | 48.97 | 0.89 | 30.22 | 69.28 |
|        |           |                |          | $\lambda_{tr} = 0.5$ | 16.93 | 24.72 | 50.46 | 0.95 | 33.20 | 72.87 |
|        |           |                |          | $\lambda_{tr} = 0.1$ | 17.17 | 24.82 | 51.43 | 0.94 | 36.10 | 73.44 |
|        |           |                | CLA      | Standard             | 13.70 | 20.50 | 45.43 | 0.72 | 26.48 | 61.76 |
|        |           |                |          | $\lambda_{tr} = 1.0$ | 14.19 | 21.12 | 45.97 | 0.72 | 27.00 | 60.89 |
|        |           |                |          | $\lambda_{tr} = 0.5$ | 17.72 | 24.36 | 50.71 | 0.99 | 35.53 | 70.86 |
|        |           |                |          | $\lambda_{tr} = 0.1$ | 14.96 | 20.79 | 45.50 | 0.71 | 25.30 | 63.21 |
| HM3D   | CoCa      | -              | -        | NoFT                 | 09.93 | 17.36 | 38.91 | 0.44 | 22.19 | 62.08 |
|        |           |                |          | Standard             | 17.34 | 21.68 | 47.46 | 0.82 | 26.90 | 72.67 |
|        |           |                |          | $\lambda_{tr} = 1.0$ | 16.61 | 19.46 | 44.83 | 0.74 | 25.84 | 70.33 |
|        |           |                |          | $\lambda_{tr} = 0.5$ | 16.51 | 20.92 | 46.29 | 0.81 | 27.41 | 72.53 |
|        |           |                |          | $\lambda_{tr} = 0.1$ | 16.57 | 21.39 | 46.73 | 0.83 | 29.36 | 72.77 |
|        |           | Ours           | Frontier | Standard             | 19.04 | 21.73 | 47.12 | 0.87 | 28.64 | 72.47 |
|        |           |                |          | $\lambda_{tr} = 1.0$ | 18.51 | 21.47 | 46.23 | 0.83 | 27.42 | 70.28 |
|        |           |                |          | $\lambda_{tr} = 0.5$ | 16.80 | 21.42 | 45.44 | 0.74 | 27.43 | 70.32 |
|        |           |                |          | $\lambda_{tr} = 0.1$ | 19.11 | 22.05 | 49.02 | 0.95 | 30.21 | 73.99 |
|        |           |                | CLA      | Standard             | 16.35 | 20.62 | 46.19 | 0.80 | 28.38 | 70.19 |
|        |           |                |          | $\lambda_{tr} = 1.0$ | 17.01 | 21.33 | 47.01 | 0.75 | 28.71 | 71.02 |
|        |           |                |          | $\lambda_{tr} = 0.5$ | 17.31 | 21.55 | 47.19 | 0.79 | 28.74 | 71.74 |
|        |           |                |          | $\lambda_{tr} = 0.1$ | 17.57 | 20.73 | 47.81 | 0.81 | 29.36 | 72.23 |

Table 3. Comparison of captioning performance on Gibson and HM3D testing sets, varying fine-tuning method and policy. KEYS –  $B_4$ : BLEU,  $M$ : METEOR,  $R_L$ : ROUGE-L,  $CI$ : CIDER,  $SP$ : SPICE,  $CS$ : cosine similarity between SBERT embedding of prediction and annotation.

CoCa and 10.2 ms for BLIP2 (averaged over 754 bounding boxes); and the pseudo-captioning time per object instance is 1.02 s (averaged over all 160 testing objects).

### D. Qualitative comparison of captioners prediction

In Fig. 1 we present some qualitative examples of predicted captions before and after fine-tuning (with triplet loss) for both CoCa and BLIP2. Off-the-shelf models predict captions containing wrong attributes (colors) or object categories not present in the images, e.g., cat, bird’s feathers, television. On the contrary, the fine-tuned models show higher accuracy in describing details of objects and generate predictions that are more consistent across different views of the same object, showing that learning the unique pseudo-caption for each object instance combined with the triplet loss enhances captions accuracy and consistency.

### E. Pseudo-captioning and ChatGPT prompts

Listing 1 shows the text prompt used to generate results with ChatGPT [3]. We use ChatGPT to generate captions from the objects crop.

Listing 2 shows the proposed text prompt for the pseudo-caption generation, where `str(captions_freq_list)` is a list of captions for different views of the same object with their frequency. Our approach combines the frequency of the captions with

Listing 1. The prompt for off-the-shelf ChatGPT.

Please provide an image caption for the provided picture. Do not use more than 5–7 words to describe the object in the image. Use simple words and don’t use more than one adjective per noun. Some examples: ‘A red couch with pillows on it’, ‘A television set on top of a table’, ‘A grey patterned armchair’

| Env    | Finetuning | $B_4$        | $M$          | $R_L$        | $CI$        | $SP$         | $CS$         |
|--------|------------|--------------|--------------|--------------|-------------|--------------|--------------|
| CoCa   | NoFT       | 16.01        | 22.19        | 46.37        | 0.88        | 31.07        | 68.71        |
|        | Triplet    | <b>17.95</b> | <b>24.10</b> | <b>48.20</b> | <b>1.05</b> | <b>32.98</b> | <b>74.03</b> |
| BLIP-2 | NoFT       | 20.85        | 23.18        | 50.39        | 1.32        | 36.48        | 73.92        |
|        | Triplet    | <b>22.70</b> | <b>25.29</b> | <b>53.12</b> | <b>1.38</b> | <b>39.90</b> | <b>77.58</b> |

Table 4. Comparison of captioning performance on occluded objects. KEYS –  $B_4$ : BLEU,  $M$ : METEOR,  $R_L$ : ROUGE-L,  $CI$ : CIDER,  $SP$ : SPICE,  $CS$ : cosine similarity between SBERT embedding of predicted and annotated captions.

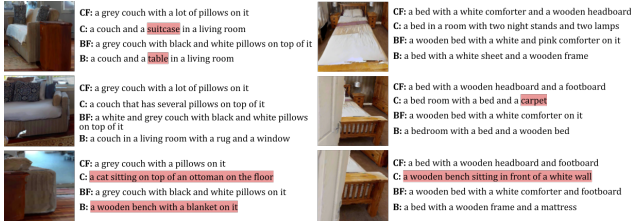

Figure 2. Captioning with different levels of occlusion. **C**: CoCa; **B**: BLIP2; **F**: fine-tuned (triplet loss)

in-context learning (provided examples of how to solve the task), to account for wrong or inconsistent captions.

## F. Performance on occluded objects

Tab. 4 reports a comparison between off-the-shelf and fine-tuned captioners (using triplet loss) on a manually collected dataset of 50 images (25 from Gibson and 25 from HM3D) of objects, with 5 images per dataset for each category in the main paper, under varying levels of occlusion based on visual inspection. The performance is evaluated using standard captioning metrics (BLEU-4, METEOR, ROUGE-L, CIDEr, SPICE and cosine similarity), and results are averaged across Gibson and HM3D. The results show that our fine-tuned models outperform off-the-shelf captioners for both CoCa and BLIP-2, indicating improved robustness to partial views and occlusions. Qualitative examples in Fig. 2 illustrate the increased consistency and accuracy of the generated captions in challenging visual conditions.

## References

- [1] E. J. Hu, Y. Shen, P. Wallis, Z. Allen-Zhu, Y. Li, S. Wang, L. Wang, W. Chen, et al. Lora: Low-rank adaptation of large

Listing 2. The prompt for our proposed method.

You are an advanced language model tasked with generating a concise and accurate caption for an object. You are given a list of captions along with their frequencies. Each caption may represent a different viewpoint and might not always be accurate. Additionally, you are provided with the correct object class to describe. Your goal is to generate a single, coherent caption that accurately describes the main object, based on the provided information. The generated caption should not exceed 20 words and must be encapsulated within <Caption> ... </Caption> tags.

Here is the format of the input you will receive:

[[frequency, "caption"]]

Example Input:

[[5, "A red apple on a table"], [3, "A shiny red apple"], [1, "A red fruit"], [2, "A red apple"]]

Example Output:

<Caption>A shiny red apple on a table</Caption>

Example Input:

[[8, "A small brown dog"], [3, "A dog"], [4, "A small dog"], [1, "A brown animal"]]

Example Output:

<Caption>A small brown dog</Caption>

Example Input:

[[6, "A blue car parked on the street"], [4, "A car"], [2, "A blue vehicle"], [1, "A car on the street"]]

Example Output:

<Caption>A blue car parked on the street</Caption>

Example Input:

[[7, "A cat sitting on a windowsill"], [5, "A windowsill cat"], [2, "A cat"], [1, "A windowsill"]]

Example Output:

<Caption>A cat sitting on a windowsill</Caption>

Example Input:

[[5, "A wooden table with a plate on it"], [2, "A table with a plate and a couch in the room"], [3, "A wooden table"], [1, "A plate on a wooden table"]]

Example Output:

<Caption>A wooden table with a plate on it</Caption>

Your Task:

1. Analyze the provided list of captions and their frequencies.
2. Synthesize an accurate caption that reflects the most reliable and frequent details.
3. Ensure the generated caption describes only the main objects and mentions other objects only in relation to the main object.
4. Ensure the generated caption is no longer than 20 words.
5. Encapsulate your generated caption within <Caption> ... </Caption> tags.

Input:

{str(captions\_freq\_list)}

Output:

- language models. In *International Conference on Learning Representations*, 2022. 1
- [2] J. Li, D. Li, S. Savarese, and S. Hoi. Blip-2: Bootstrapping language-image pre-training with frozen image encoders and large language models. In *International Conference on Machine Learning*, 2023. 1, 2
- [3] OpenAI. Chatgpt conversation on citation formats. <https://chat.openai.com>, 2025. 2
- [4] S. K. Ramakrishnan, A. Gokaslan, E. Wijmans, O. Maksymets, A. Clegg, J. Turner, E. Undersander, W. Galuba, A. Westbury, A. X. Chang, M. Savva, Y. Zhao, and D. Batra. Habitat-matterport 3d dataset (hm3d): 1000 large-scale 3d environments for embodied ai, 2021. 1
- [5] J. Yu, Z. Wang, V. Vasudevan, L. Yeung, M. Seyedhosseini, and Y. Wu. Coca: Contrastive captioners are image-text foundation models. *arXiv:2205.01917v2 [cs.CV]*, 2022. 1, 2
